# Supplementary material
Source: PubMed Central journal article supplement (PMC7667960)
Supplement: supp_RA120.014814_161500_3_supp_592688_qg4z4l.pdf [file supp_RA120.014814_161500_3_supp_592688_qg4z4l.pdf]

## Supplementary Figure 1

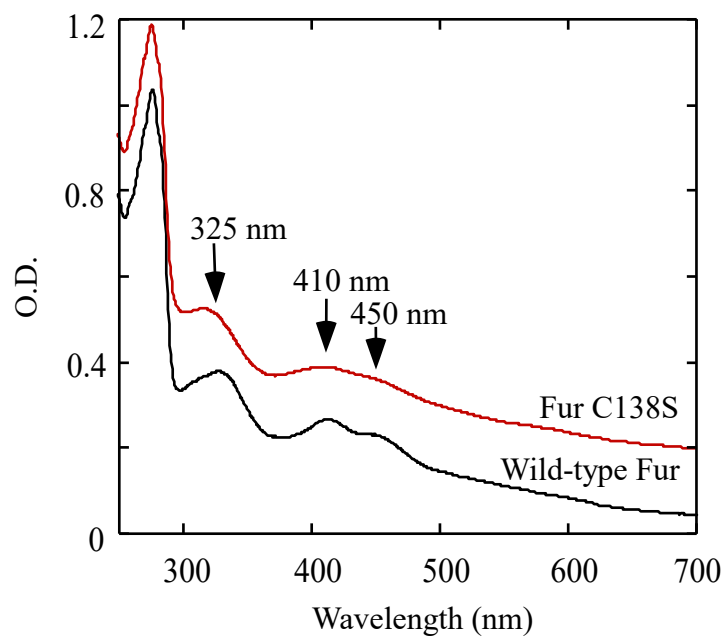

**Supplementary Figure 1. UV-Visible absorption spectrum of the *E. coli* Fur mutant C138S.** Wild-type *E. coli* Fur and the Fur mutant C138S were purified from the *E. coli iscA/sufA* mutant cells grown in LB medium. The protein concentration was about 100  $\mu$ M. The spectrum of the Fur mutant C138S was offset by O.D. of 0.2.

## Supplementary Figure 2

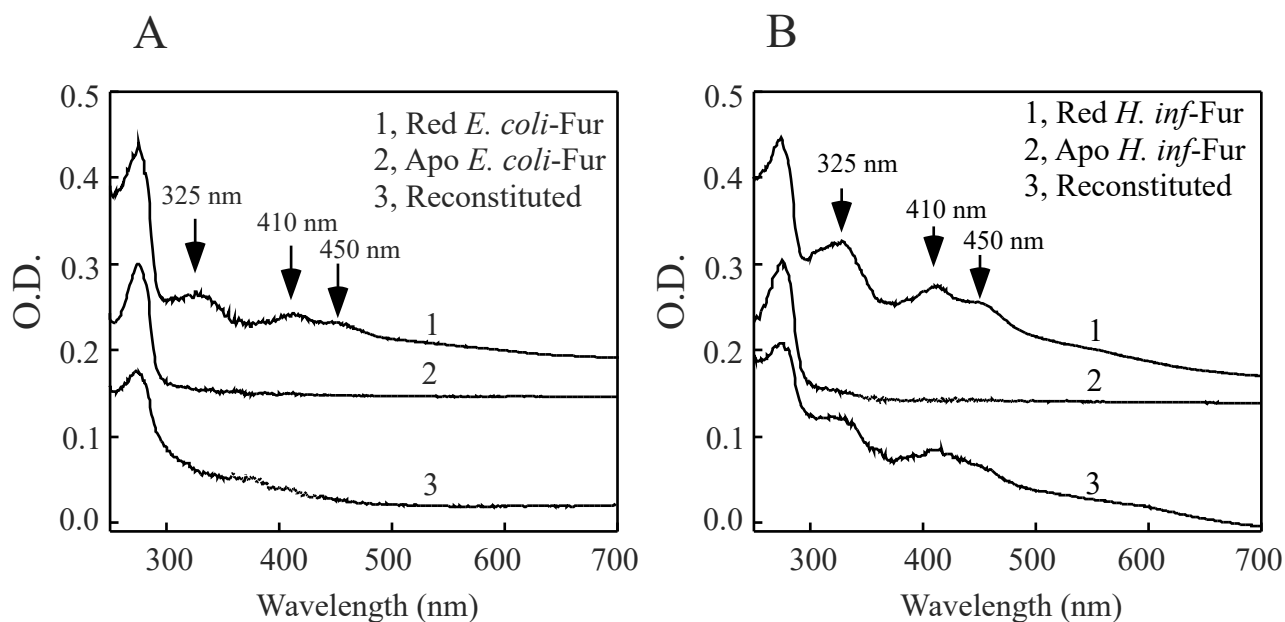

**Supplementary Figure 2. *In vitro* reconstitution of the [2Fe-2S] cluster in the *E. coli* Fur and the *H. influenzae* Fur.** **A**), recombinant *E. coli* Fur proteins were prepared from the *E. coli iscA/sufA* mutant cells grown in LB medium containing 0 (spectrum 1) or 200  $\mu\text{M}$  (spectrum 2) of 2,2'-dipyridyl. Apo-form *E. coli* Fur protein (50  $\mu\text{M}$ ) was then incubated with 200  $\mu\text{M}$   $\text{Fe}(\text{NH}_4)_2(\text{SO}_4)_2$ , 1 mM L-cysteine, 1  $\mu\text{M}$  *E. coli* cysteine desulfurase (IscS), and 4 mM dithiothreitol for 30 minutes, followed by passing through a High-Trap Desalting column to re-purify the protein. Re-purified Fur protein was subjected to the UV-Visible absorption measurement (Spectrum 3). The protein concentrations were about 20  $\mu\text{M}$ . Spectra of the Fur proteins were offset for clarity. **B**), as in **A**), except recombinant *H. influenzae* Fur proteins were prepared from the *E. coli iscA/sufA* mutant cells grown in LB medium containing 0 (spectrum 1) or 200  $\mu\text{M}$  (spectrum 2) of 2,2'-dipyridyl. Spectrum 3, apo-form *H. influenzae* Fur protein after reconstitution as described in **A**).

**Supplementary Table 1. Mössbauer Parameters for Selected Protein-Bound Fe-S clusters**

|                              |                                                           |              | <i>Experimental MB parameters at 4.2 K</i> |                           |           |
|------------------------------|-----------------------------------------------------------|--------------|--------------------------------------------|---------------------------|-----------|
| Cluster Type                 | Protein                                                   | Cluster spin | $\delta$ (mm/s)                            | $\Delta E_Q$ (mm/s)       | Ref.      |
| [Fe]-4Cys                    | <i>Rubredoxin</i><br>( <i>C. pasteurianum</i> )           | 5/2          | 0.24                                       | 0.5                       | (1)       |
| [Fe]-4Cys                    | <i>Desulforedoxin</i><br>( <i>D. gigas</i> )              | 5/2          | 0.25                                       | 0.75                      | (2)       |
| [Fe]-3Cys1Ser                | <i>C42S Rubredoxin</i><br>( <i>C. pasteurianum</i> )      | 5/2          | 0.26                                       | 0.7                       | (1)       |
| [Fe]-3Cys1Ser                | <i>C9S Rubredoxin</i><br>( <i>C. pasteurianum</i> )       | 5/2          | 0.26                                       | 0.7                       | (1)       |
| [2Fe-2S]-4Cys                | <i>Ferredoxin</i><br>( <i>P. aeruginosa</i> )             | 0            | 0.27                                       | 0.60                      | (3)       |
| [2Fe-2S]-3Cys1His            | <i>Rieske protein</i><br>( <i>T. thermophilus</i> )       | 0            | 0.32; 0.24                                 | 0.91; 0.52                | (4)       |
| [2Fe-2S]-3Cys <sup>(a)</sup> | <i>Glutaredoxin</i> (human)                               | 0            | 0.27                                       | 0.61                      | (5)       |
| [2Fe-2S]-3Cys <sup>(a)</sup> | <i>Rubredoxin C42A</i><br>( <i>C. pasteurianum</i> )      | 0            | 0.30; 0.29                                 | 0.71; 0.58                | (6)       |
| [2Fe-2S]-3Cys1His            | <i>mitoNEET</i> (human)                                   | 0            | 0.26; 0.30                                 | 0.47; 0.96                | (7)       |
| [2Fe-2S]-3Cys1His            | <i>IscU</i><br>( <i>A. vinelandii</i> )                   | 0            | 0.27; 0.32                                 | 0.66; 0.94                | (8)       |
| [3Fe-4S]-3Cys                | <i>Ferredoxin</i><br>( <i>A. vinelandii</i> )             | 1/2          | 0.27                                       | 0.63                      | (9)       |
| [4Fe-4S]-4Cys                | <i>Ferredoxin</i><br>( <i>B. stearothermophilus</i> )     | 0            | 0.43; 0.42                                 | 1.50; 1.20;<br>1.10; 0.66 | (10)      |
| [4Fe-4S]-4Cys                | <i>FNR anaerobic</i><br>( <i>E. coli</i> )                | 0            | 0.45                                       | 1.22                      | (11)      |
| [2Fe-2S]-4Cys                | <i>FNR exposed to O<sub>2</sub></i><br>( <i>E. coli</i> ) | 0            | 0.28                                       | 0.58                      | (11)      |
| [2Fe-2S]-3Cys                | <i>Fur</i> ( <i>E. coli</i> )                             | 0            | 0.29                                       | 0.53                      | This work |

Notes: (a) in these proteins only three ligands were identified as Cysteine. The respective studies indicated that the fourth ligand is unknown, but it is unlikely to be His.

## References

1. Yoo, S. J., Meyer, J., Achim, C., Peterson, J., Hendrich, M. P., and Münck, E. (2000) Mossbauer, EPR, and MCD studies of the C9S and C24S variants of *C. pasteurianum* rubredoxin and MCD studies of the wild-type protein. *J. Biol. Inorg. Chem* **5**, 475-487
2. Moura, I., Huynh, B. H., Hausinger, R. P., LeGall, J., Xavier, A. V., and Munck, E. (1980) Mössbauer and EPR studies of desulfuredoxin from *Desulfovibrio gigas*, . *J. Biol. Chem.* **255**, 2493–2498
3. E., M., Debrunner, P. G., Tsibris, J. C. M., and Gunsalus, I. G. (1972) Mossbauer Parameters of Putidaredoxin and its Selenium Analog. *Biochemistry* **11**, 855-863
4. Fee, J. A., Findling, K. L., Yoshida, T., Hille, R., Tarr, G. E., Hearshen, D. O., Dunham, W. R., Day, E. P., Kent, T. A., and Münck, E. (1984) Purification and characterization of the Rieske iron-sulfur protein from *Thermus thermophilus*. Evidence for a [2Fe-2S] cluster having non-cysteine ligands. *J. Biol. Chem.* **259**, 124-133
5. Lillig, C. H., Berndt, C., Vergnolle, O., Lonn, M. E., Hudemann, C., Bill, E., and Holmgren, A. (2005) Characterization of human glutaredoxin 2 as iron-sulfur protein: a possible role as redox sensor. *Proc. Natl. Acad. Sci. U. S. A.* **102**, 8168-8173
6. Meyer, J., Gagnon, J., Gaillard, J., Lutz, M., Achim, C., Munck, E., Petillot, Y., Colangelo, C. M., and Scott, R. A. (1997) Assembly of a [2Fe-2S]<sub>2</sub><sup>+</sup> cluster in a molecular variant of *Clostridium pasteurianum* rubredoxin. *Biochemistry* **36**, 13374-13380.
7. Ferecatu, I., Goncalves, S., Golinelli-Cohen, M. P., Clemancey, M., Martelli, A., Riquier, S., Guittet, E., Latour, J. M., Puccio, H., Drapier, J. C., Lescop, E., and Bouton, C. (2014) The Diabetes Drug Target MitoNEET Governs a Novel Trafficking Pathway to Rebuild an Fe-S Cluster into Cytosolic Aconitase/Iron Regulatory Protein 1. *J. Biol. Chem.* **289**, 28070-28086
8. Chandramouli, K., Unciuleac, M. C., Naik, S., Dean, D. R., Huynh, B. H., and Johnson, M. K. (2007) Formation and properties of [4Fe-4S] clusters on the IscU scaffold protein. *Biochemistry* **46**, 6804-6811
9. Kent, T. A., Huynh, B. H., and Munck, E. (1980) Iron-sulfur proteins: spin-coupling model for three-iron clusters. *Proc. Natl. Acad. Sci. U. S. A.* **77**, 6574-6576.
10. Middleton, P., Dickson, D. P. E., Johnson, C. E., and Rush, J. D. (1978) Interpretation of the Mössbauer Spectra of the Four-Iron Ferredoxin from *Bacillus stearothermophilus*. *European Journal of Biochemistry* **88**, 135-141
11. Khoroshilova, N., Popescu, C. V., Münck, E., Beinert, H., and Kiley, P. J. (1997) Iron-sulfur cluster disassembly in the FNR protein of *Escherichia coli* by O<sub>2</sub>: [4Fe-4S] to [2Fe-2S] conversion with loss of biological activity. *Proc. Natl. Acad. Sci. USA* **94**, 6087
